1 **Cellular heterogeneity in pressure and growth emerges from tissue topology and**  
2 **geometry**

3 Yuchen Long<sup>1,\*</sup>, Ibrahim Cheddadi<sup>2,3</sup>, Vincent Mirabet<sup>1</sup>, Mathilde Dumond<sup>1,4</sup>, Christophe  
4 Godin<sup>1,2</sup>, Arezki Boudaoud<sup>1,\*</sup>.

5 1. Laboratoire Reproduction et Développement des Plantes, Univ Lyon, ENS de Lyon,  
6 UCB Lyon 1, CNRS, INRA, INRIA, F-69342, Lyon, France.

7 2. INRIA/CIRAD/INRA Project-team Virtual Plants, France.

8 3. Current address: Laboratoire TIMC-IMAG/DyCTiM, Université Grenoble Alpes, CNRS,  
9 UMR 5525, 38706 La Tronche, France.

10 4. Current address: Department of Biosystems Science and Engineering, ETH Zurich,  
11 Mattenstrasse 26, 4058, Basel, Switzerland.

12 \*. Correspondence and requests for materials should be addressed to  
13 [yuchen.long@ens-lyon.fr](mailto:yuchen.long@ens-lyon.fr) or [arezki.boudaoud@ens-lyon.fr](mailto:arezki.boudaoud@ens-lyon.fr)

14 The authors declare no competing financial interests.

15 **Summary**

16 Cell-to-cell heterogeneity is observed in many biological phenomena like gene expression,  
17 signalling, cell size regulation and growth<sup>1-8</sup>. Notably, heterogeneity in cell size and growth  
18 rate prevails in many systems and impacts tissue patterning and macroscopic growth  
19 robustness<sup>1,2</sup>. From physical perspective, cell volume change is driven by osmosis<sup>9-11</sup> and the  
20 subsequent intracellular hydrostatic pressure, which sustains cellular osmotic potential and is  
21 confined by peripheral constraints (plasma membrane, cytoskeletal cortex, extracellular  
22 matrix or cell wall) in plant<sup>12</sup>, animal<sup>13</sup>, tumorous<sup>14</sup> and microbial cells<sup>15</sup>. Despite numerous  
23 studies in unicellular systems<sup>15,16</sup>, the spatial variation of hydrostatic pressure in multicellular  
24 tissues, and its relation with cell-to-cell growth variability, remain elusive. Here, using atomic  
25 force microscopy, we demonstrate that hydrostatic pressure is highly heterogeneous between  
26 adjacent cells in the epidermis of Arabidopsis shoot apical meristem, and it unexpectedly

27 correlates either positively or negatively with cellular growth rate depending on growth  
28 conditions. Combining experimental arguments and physical modelling of cell wall  
29 mechanics and osmosis within multicellular tissues, we show that heterogeneities in pressure  
30 and growth are not random, and they spontaneously emerge from cell size and tissue topology.  
31 Together, we propose that cellular pressure build-up, a physical phenomenon, and growth rate,  
32 a biological property, are innately heterogeneous and modulate cell size homeostasis in any  
33 compact tissue with inhomogeneous topology.

#### 34 **One sentence summary**

35 Tissue geometry and topology prescribe heterogeneity in hydrostatic pressure and growth.

#### 36 **Key words**

37 Cellular heterogeneity, hydrostatic pressure, tissue topology, growth mechanics, atomic force  
38 microscopy, biophysical modelling.

#### 39 **Main text**

40 Growth is driven by osmosis and constrained by cell envelop. Cells with rigid cell walls – like  
41 in plants, bacteria and fungi – can sustain high osmotic potential by accumulating hydrostatic  
42 pressure, alias turgor pressure, greater than atmospheric pressure (Extended Data Fig. 1)<sup>12</sup>.  
43 Animal cells also accumulate hydrostatic pressure, especially when compacted or  
44 contracting<sup>13,14</sup>. In plants, turgor pressure is believed to positively correlate with growth rate,  
45 as depicted in the Lockhart-Ortega equation (Extended Data Fig. 1)<sup>17</sup>. However, observations  
46 suggest that growth rate and pressure level are not always associated<sup>16</sup>, challenging the link  
47 between growth regulation and cellular pressure build-up.

48 Recent advances in atomic force microscopy (AFM) enabled non-invasive turgor pressure  
49 measurement utilizing indentation force-displacement and surface topography in living plant  
50 cells (Fig. 1A)<sup>18</sup>. We took advantage of these advances and assessed the relation between  
51 cell-specific turgor pressure and growth in the epidermis of the *Arabidopsis thaliana* shoot  
52 apical meristem (SAM), a system featuring substantial growth heterogeneity<sup>1</sup>. We included

53 untreated wild-type SAM and a conceptually simpler model of chemically treated SAM that  
54 resembles a “foam of cells” (co-treated with naphthylphthalamic acid (NPA), a polar auxin  
55 transport inhibitor that induces pin-formed SAM, and oryzalin, a microtubule-depolymerizing  
56 drug that blocks cell division but permits continuous, isotropic growth; hereafter referred to as  
57 “oryzalin-treated SAM”),<sup>19</sup>.

58 Cell walls are often curved in oryzalin-treated SAM, suggesting that neighbouring cells have  
59 different turgor pressure<sup>19</sup>. Cell-specific AFM measurements on nine SAMs revealed that  
60 turgor pressure is markedly heterogeneous in oryzalin-treated SAM epidermis (Fig. 1E). Each  
61 SAM had a different average turgor pressure (Extended Data Fig. 2), consistent with previous  
62 report<sup>20</sup>. We subtracted this difference by normalizing cellular pressure to the average pressure  
63 per SAM, and found that turgor pressure anticorrelates with the number of epidermal  
64 cell-neighbours: cells with fewer neighbours have higher turgor pressure, with 1.4-fold  
65 difference between four and eight-neighbour cells ( $n = 202$  cells, Pearson correlation  
66 coefficient  $R = -0.34$ ,  $p < 10^{-6}$ ) (Fig. 1F), consistent with previous prediction<sup>19</sup>. In untreated  
67 SAMs, we also detected similar turgor–neighbour-number anticorrelation (5 SAMs,  $n = 326$   
68 cells,  $R = -0.16$ ,  $p = 0.004$ ) (Fig. 1G-J, Extended Data Fig. 3), confirming that non-random  
69 turgor pressure heterogeneity establish robustly in tissues with static topology (no neighbour  
70 number change) or dynamic topology (neighbour number changes due to division).

71 Earlier works<sup>19,21</sup> treated intracellular pressure as an input or required differential osmotic  
72 pressure. We explored the topological association of turgor pressure variability by  
73 constructing a 2D vertex model, with topological distribution similar to SAM (Extended Data  
74 Fig. 4), attributing turgor build-up and in-tissue water flow to osmosis and wall mechanics  
75 (Cheddadi et al. unpublished) (Fig. 2A). The model expands the Lockhart-Ortega equation of  
76 visco-elasto-plastic growth of single cell (Extended Data Fig. 1)<sup>17</sup> to cell walls in a  
77 multicellular tissue with more realistic 2D polygonal geometry. Cell wall growth is akin to  
78 visco-plastic flow (irreversible deformation) and occurs when elastic strain (reversible  
79 deformation) induced by turgor pressure is greater than a threshold (Fig. 2A). Water influx  
80 follows the cross-membrane water potential difference, and turgor-driven intercellular water  
81 redistribution is allowed via plant plasmodesmata<sup>22</sup>, animal gap junctions or cytoplasmic

82 bridges<sup>23,24</sup>. We did not prescribe turgor pressure, instead letting it emerge from local  
83 mechanical and hydraulic interplays. Surprisingly, with homogenous cellular parameters, we  
84 could recover the turgor–neighbour-number anticorrelation in our model, without or with cell  
85 divisions to mimic oryzalin-treated or untreated SAM (no division 5 simulations,  $n = 1219$   
86 cells,  $R = -0.87$ ,  $p < 10^{-100}$ ; dividing 8 simulations,  $n = 3240$  cells,  $R = -0.58$ ,  $p < 10^{-100}$ ) (Fig.  
87 2B-G). This implies that local hydrostatic pressure heterogeneity does not require differential  
88 cellular osmotic pressure<sup>19</sup>, and predicts a topological origin of pressure variability, similar to  
89 liquid foams<sup>25</sup>.

90 In SAM surface, cell neighbour number and size are coupled (Extended Data Fig. 4).  
91 Consistently, cell-specific turgor pressure anticorrelates with normalized cell area (Extended  
92 Data Fig. 4). We modified the initial state of our simulation to have four-neighbour cells  
93 bigger than eight-neighbour cells, and found that higher turgor pressure accumulated in  
94 four-neighbour cells, not in the smaller cells (Extended Data Fig. 4), confirming that turgor  
95 pressure heterogeneity emerges from tissue topology rather than cell size differences. This can  
96 be explained by local topology, which determines cell wall angles and the subsequent tension  
97 distribution at each three-cell junction (Fig. 2H-K): in our model with wall rheology and  
98 hydraulic limitations, elastic strain (relative deformation) and stress (tension) are capped  
99 slightly above the growth-threshold, and are almost homogeneous in the tissue. Therefore, the  
100 sum of wall tension at each three-cell junction (vertex) depends only on the angles between  
101 walls. The vertex between three hexagonal cells with  $120^\circ$  internal angles has a sum of  
102 tension at zero (Fig. 2H, I). Fewer-neighbour cells have sharper internal angles, so the sum  
103 of tension at vertex is greater towards the cell interior, creating additional inward compression  
104 and prompting higher pressure build-up at equilibrium (Fig. 2J, K). Since topology is highly  
105 conserved in many biological systems<sup>26</sup>, we propose that hydrostatic pressure heterogeneity is  
106 an innate characteristic of any compact tissue with polygonal cells<sup>27</sup>, which adjusts itself to  
107 reconcile local mechanical and hydraulic conditions.

108 Next, we monitored areal growth rate of SAM epidermal cells by time-lapse confocal  
109 microscopy. Growth rate in untreated SAMs anticorrelates with neighbour number (11 SAMs,  
110  $n = 2013$  cells,  $R = -0.13$ ,  $p < 10^{-8}$ ; Fig. 3E) and cell size (Fig. 3F;  $R = -0.28$ ,  $p < 10^{-36}$ ),

111 supporting previous reports that smaller cells in SAM grow faster<sup>28,29</sup>, and suggests that  
112 higher turgor pressure in fewer-neighbourred cells associates with faster growth. Unexpectedly,  
113 in oryzalin-treated SAMs, the fewer-neighbourred and small cells grew slower (14 SAMs,  $n =$   
114 1160 cells; Fig. 3K, neighbour number  $R = 0.14$ ,  $p < 10^{-5}$ ; Fig. 3L, cell size  $R = 0.22$ ,  $p =$   
115  $10^{-14}$ ). This suggests that higher turgor pressure associates with either faster or slower growth  
116 depending on conditions (Extended Data Fig. 4). Although seemingly a small shift, this  
117 negative-to-positive slope change of local growth heterogeneity captures a strong qualitative  
118 inversion of growth behaviour (Fig. 3D, J), where relative cell size increases exponentially in  
119 opposite fashions (Extended Data Fig. 5).

120 We explored growth variability with our model: Non-random growth heterogeneity emerged  
121 from homogenous parametric inputs, with the smaller, fewer-neighbourred cells growing faster  
122 (8 simulations,  $n = 3240$  cells;  $G$  vs  $N$ ,  $R = -0.05$ ,  $p = 0.002$ , Fig. 4B;  $G$  vs  $A$ ,  $R = -0.82$ ,  $p <$   
123  $10^{-100}$ ) that recapitulates untreated SAM (Fig. 3A-F). We attempted to simulate  
124 oryzalin-treated SAM by blocking cell division, but found it not sufficient to invert the  
125 topology-growth trend (Fig. 4D-F), indicating that additional parameter changes are needed to  
126 recapitulate oryzalin-treated growth heterogeneity.

127 Our model predicts two antagonistic phenomena that impact growth: growth rate depends on  
128 water access across cell surface, so smaller cells benefit from higher surface-versus-volume  
129 ratio for relatively more water influx and volume increase; meanwhile, the often-smaller  
130 fewer-neighbourred cells are under extra mechanical compression due to tissue topology (Fig.  
131 2K) and would grow slower. Since the often-smaller fewer-neighbourred cells grow faster in  
132 untreated meristems, the model suggests that flux limitation is predominant in this condition,  
133 while oryzalin treatment elevates the relative importance of the mechanical limitation. We  
134 explored the parameter space of the model, and found that raising strain threshold or  
135 decreasing osmotic pressure can elevate the predominance of mechanical constraint (Fig.  
136 4G-L), effectively switching the foam-like system from cell-size-and-flux-controlling to  
137 topology-and-mechanic-controlling (Extended Data Fig. 6).

138 Interestingly, growth rate correlates better with cell size in simulations representing untreated

139 SAM growth trends (Fig. 4A-F) or with neighbour number in oryzalin-like models (Fig.  
140 4G-L). We tested this experimentally, focusing on the slope of growth rate against neighbour  
141 number or cell size, and found that level of growth heterogeneity in individual SAMs  
142 correlates with average SAM growth rate (Extended Data Fig. 6): topology-associated growth  
143 heterogeneity is stronger in fast-growing oryzalin-treated SAMs ( $n = 14$  SAMs,  $R = 0.63$ ,  $p =$   
144  $0.02 < 0.05$ ), while size-associated growth heterogeneity is stronger in slow-growing  
145 untreated SAMs ( $n = 11$  SAMs,  $R = 0.68$ ,  $p = 0.02 < 0.05$ ) (Extended Data Fig. 6). No  
146 significant correlation of size-associated growth heterogeneity was found in oryzalin-treated  
147 SAMs ( $R = 0.14$ ,  $p = 0.53 > 0.05$ ), neither topology-associated correlation in untreated SAMs  
148 ( $R = 0.56$ ,  $p = 0.07 > 0.05$ ). This indicates that growth heterogeneity is more sensitive to  
149 size-related properties in untreated SAMs, or to topology-related properties in oryzalin-treated  
150 SAMs, as predicted by the model and unlike liquid foams where topology always dominates.  
151 Furthermore, it shows that growth heterogeneity scales with global growth speed, where  
152 faster growth enhances the cell size diverging effect of oryzalin treatment, and reduces the  
153 cell size homogenizing tendency in untreated scenario (Extended Data Fig. 6), suggesting that  
154 faster tissue growth favours enhanced cell size variability.

155 Together, we demonstrate that cellular hydrostatic pressure is innately heterogeneous in  
156 Arabidopsis SAM epidermis, however it is not a proxy of local growth rate variability, as  
157 previously believed. Instead, turgor pressure and growth rate are combinatorial outputs of  
158 local mechanics and hydraulics. Each of these parameters can be controlled by genetic and  
159 biochemical inputs, and small changes in these biological inputs can enable drastic shifts of  
160 cell size distribution (Extended Data Fig. 6), unlike liquid foams in which cell size  
161 distribution always enlarge over time. For example, a growth variability switch is observed  
162 during sepal development, where smaller and often fewer-neighboured cells grow faster in  
163 young sepals then slower in older sepals, effectively switching from homogenizing to  
164 amplifying cell size variability<sup>30</sup>. The emergent heterogeneity of local growth and hydrostatic  
165 pressure likely underlies morphogenesis in other compact tissues with polygonal cells.

## 166 **Acknowledgements**

167 We thank L. Beuzamy for AFM training and G. Cerrutti for help in implementing the  
168 division algorithm. This work was supported by a fellowship from Institut Universitaire de  
169 France and an ERC Starting Grant “PhyMorph” to A.B. (ERC-2012-StG-307387), an EMBO  
170 Long-term Fellowship to Y.L. (EMBO ALTF 168-2015), and an Agropolis Foundation grant  
171 (MecaFruit3D) to I.C. and C.G.

## 172 **Author contributions**

173 This study was initiated by A.B. Y.L. and A.B. designed the experiments. Y.L. executed AFM  
174 and confocal microscopy, acquired and analysed experimental data. I.C. and C.G. designed  
175 physical model. I.C. implemented the model, ran simulations, optimized model parameters  
176 and analysed simulation data. V.M and M.D. wrote scripts to facilitate experimental data  
177 subtraction and analysis. Y.L. and A.B. wrote the manuscript with inputs from other authors.  
178 Y.L., I.C., M.V., M.D., C.G. and A.B. contributed to data interpretation and critical reading of  
179 the manuscript.

180

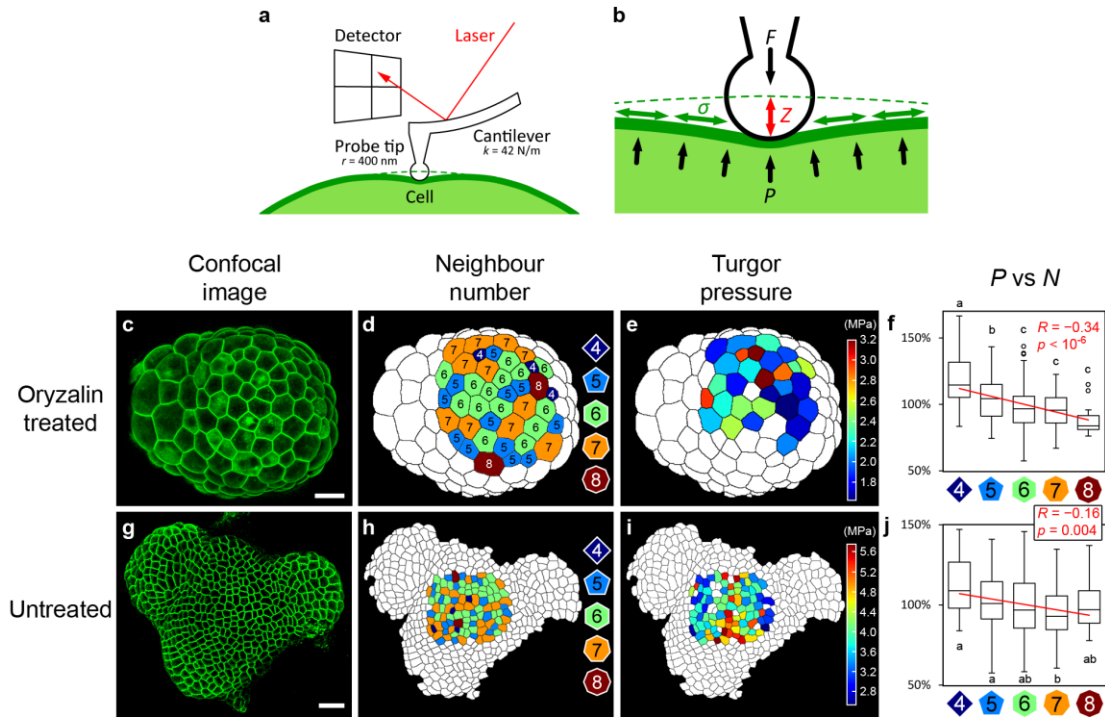

**Figure 1. Turgor pressure heterogeneity in SAM is associated with variation of cell topology.**

(a and b) Schematic representation of AFM nanoindentation for turgor pressure measurement.  $r$ , probe tip radius;  $k$ , cantilever stiffness;  $F$ , indentation force;  $Z$ , indentation depth;  $P$ , turgor pressure;  $\sigma$ , cell wall tension. (c to j) Cell-specific turgor pressure in oryzalin-treated (c to f) and untreated SAM (g to j). (c and g) Top-view surface projections of SAM, oryzalin-treated (c) or untreated (g), with plasma membrane GFP signal; scale bars represent 20  $\mu\text{m}$ . (d and h) Cell topology determined on segmented cell contour images, around SAM centre; numbers indicate neighbour number in epidermis. (e and i) AFM-determined cell-specific turgor pressure heat maps. (f and j) Box plots of cellular turgor pressure  $P$  normalized per SAM against cell topology  $N$  (f, oryzalin-treated 9 SAMs,  $n = 202$  cells; j, untreated 5 SAMs,  $n = 326$  cells). Circles are Tukey's outliers; lowercase letters indicate statistically different populations (Student's  $t$ -test,  $p < 0.05$ ); red lines indicate linear regressions, with Pearson correlation coefficient  $R$  and corresponding  $p$ -value.



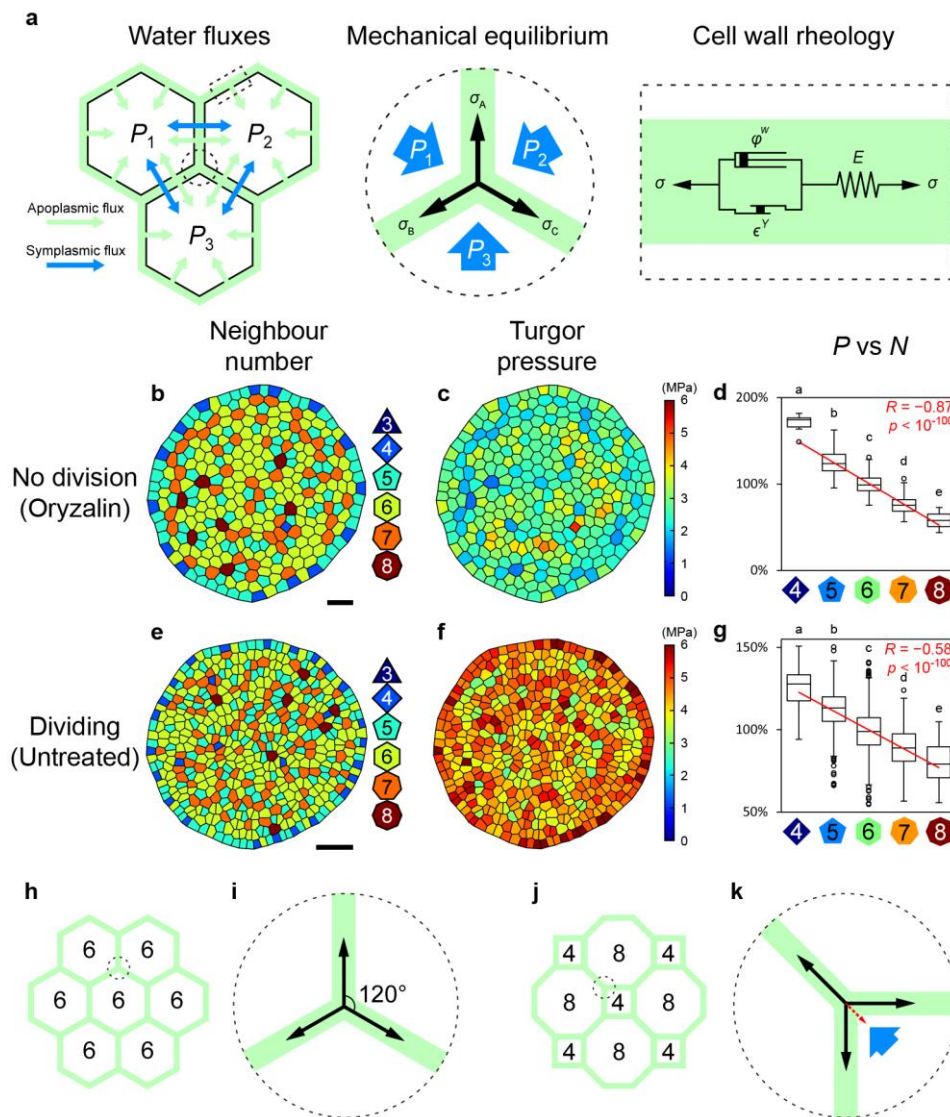

**Figure 2. Turgor pressure heterogeneity emerges from cell topology.**

(a) Schematic representations of model components, including apoplastic and intercellular water fluxes (left), mechanical equilibrium at three-cell junctions (middle) and the visco-elasto-plastic cell wall rheology.  $P$ , cell-specific turgor pressure;  $\sigma$ , cell wall tension;  $\phi^w$ , wall extensibility;  $\epsilon^Y$ , wall strain threshold;  $E$ , wall Young's modulus. (b to g) Turgor pressure in non-dividing (oryzalin-treated, b to d) and dividing (untreated) simulations (e to g), scale bars are 5 unit length. (b and e) Cell topology; (c and f) cellular turgor pressure heat maps; (d and g) Box plots of normalized cellular turgor pressure  $P$  against cell topology  $N$  (d, non-dividing 5 simulations,  $n = 1219$  cells; g, dividing 8 simulations,  $n = 3240$  cells). Cells on the mesh edge were not analysed due to border effect. Circles are Tukey's outliers; lowercase letters indicate statistically different populations (Student's  $t$ -test,  $p < 0.05$ ); red lines indicate linear regressions, with Pearson correlation coefficient  $R$  and corresponding  $p$ -value. (h to k) Schematic explanation of topology-derived turgor pressure heterogeneity. (h and i) Three-cell junctions in a tissue of hexagonal cells are at mechanical equilibrium with equal wall-wall angles. (j and k) Fewer-neighbour cells have sharper wall-wall angles, effectively resulting in mechanical compression due to unequal tension distribution (red dash-line arrow) that is balanced by higher turgor pressure build-up (big blue arrow).

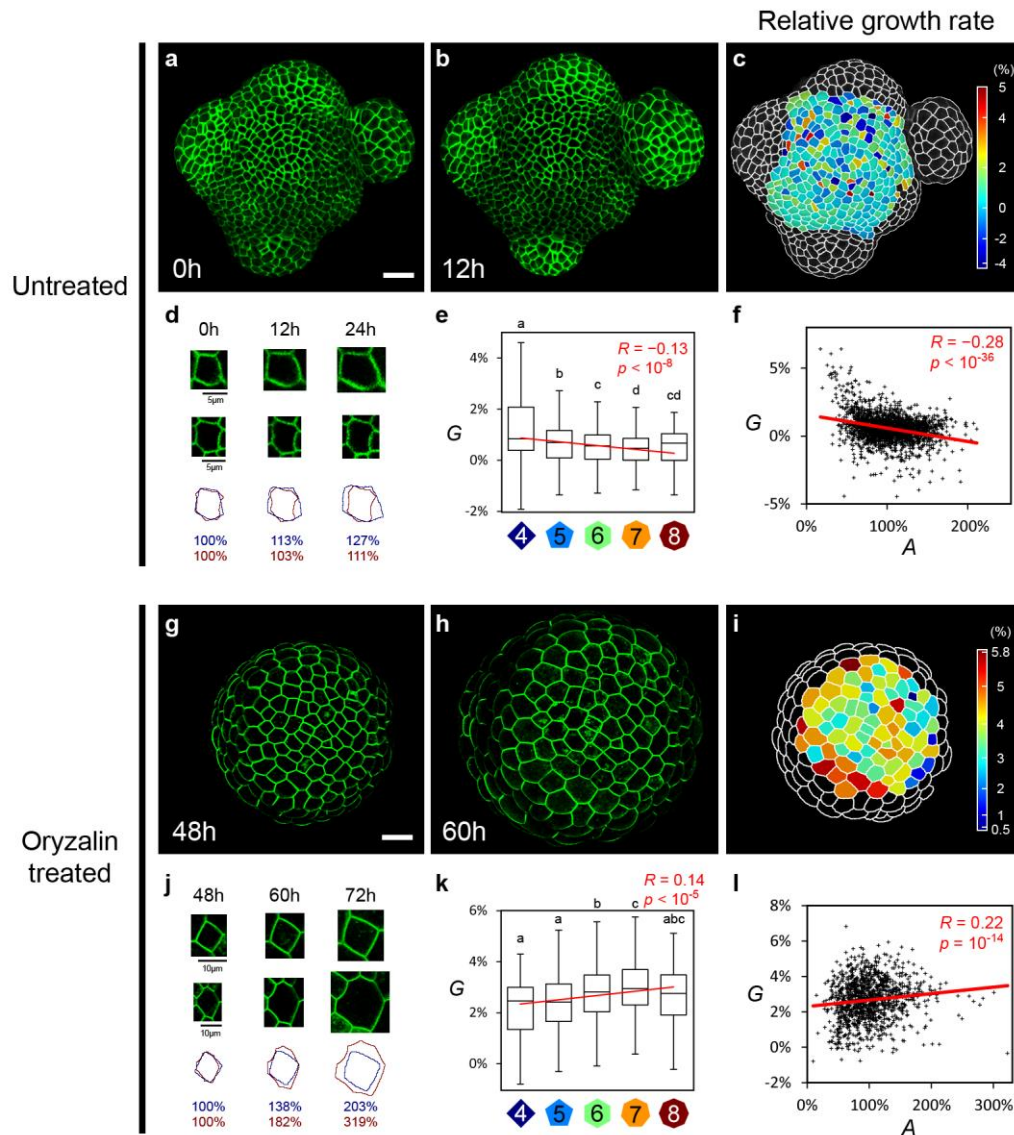

**Figure 3. Cellular growth rate bifurcates between conditions.**

(a to f) Relative growth rate per hour  $G$  of untreated SAM cells between 12-hour interval. (g to l) Cellular growth rate per hour of oryzalin-treated SAM between 12-hour interval (48 and 60 hours post treatment). (a, b, g and h) Surface projections of untreated or oryzalin-treated SAM at initial time point (a and g) and 12 hours later (b and h); scale bars are 20  $\mu\text{m}$  unless otherwise noted. (c and i) Heat maps of areal relative growth rate per hour. Note that the colour lookup tables are exponential. (d and j) Example 4 and 8-neighbored cells during 24-hour growth, with areal normalization at initial time point. Cell contour and relative size (blue for 4-neighbored, red for 8-neighbored) depict the diverging growth trends. Scale bars are as indicated. (e, f, k and l) Box plots of relative growth rate per hour  $G$  against cell topology  $N$  (e and k) and dot plots of relative growth rate per hour  $G$  against normalized cell area  $A$  (f and l) (e and f, untreated 11 SAMs,  $n = 2013$  cells; k and l, oryzalin-treated 14 SAMs,  $n = 1160$  cells). Note that Tukey's outliers are not plotted, but are included for statistical analyses. Lowercase letters indicate statistically different populations (Student's  $t$ -test,  $p < 0.05$ ); red lines indicate linear regressions, with Pearson correlation coefficient  $R$  and corresponding  $p$ -value.

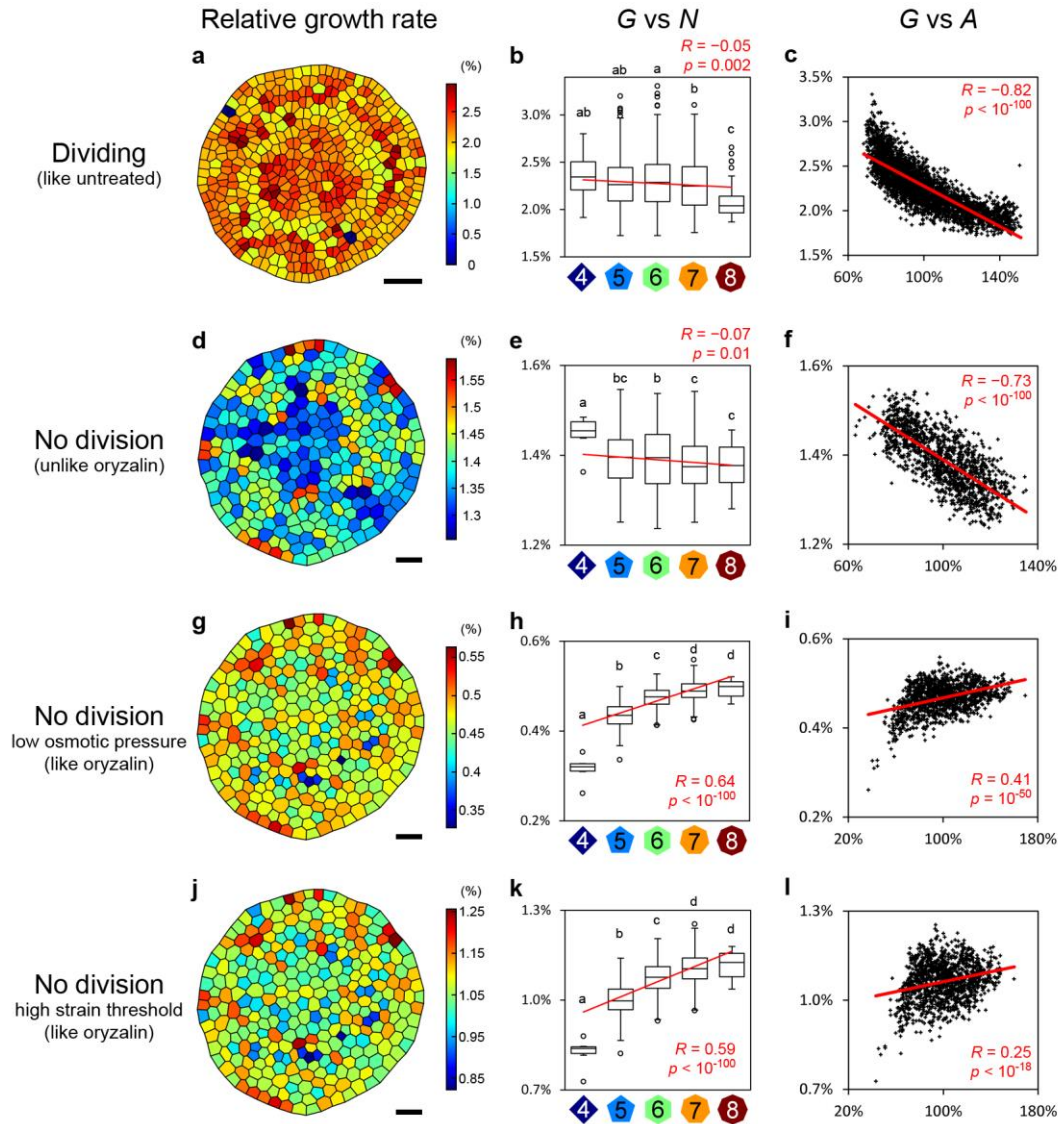

**Figure 4. Reducing osmotic pressure or increasing growth threshold invert growth trend.**

(a to c) Relative growth rate per hour  $G$  in simulations with cell division, which mimics untreated SAM. Cells that just divided (dark blue) are not included in analysis. (d to f) Growth simulations with no cell division to mimic oryzalin treatment. Growth does not recapitulate oryzalin-treated SAM. (g to i) Growth simulations with no division plus reduced osmotic pressure. Growth recapitulates oryzalin-treated SAM. (j to l) Growth simulations with no division plus elevated cell wall strain threshold. Growth also recapitulates oryzalin treatment. (a, d, g and j) Heat maps of areal relative growth rate per hour. Scale bars are 5 unit lengths. (b, e, h and k) Box plots of relative growth rate per hour  $G$  against cell topology  $N$  (b, dividing 8 simulations,  $n = 3240$  cells; e, h and k, non-dividing 5 simulations each,  $n = 1219$  cells). Lowercase letters indicate statistically different populations (Student's  $t$ -test,  $p < 0.05$ ); red lines indicate linear regressions, with Pearson correlation coefficient  $R$  and corresponding  $p$ -value. (c, f, i and l) Dot plots of relative growth rate per hour  $G$  against normalized cell area  $A$ .

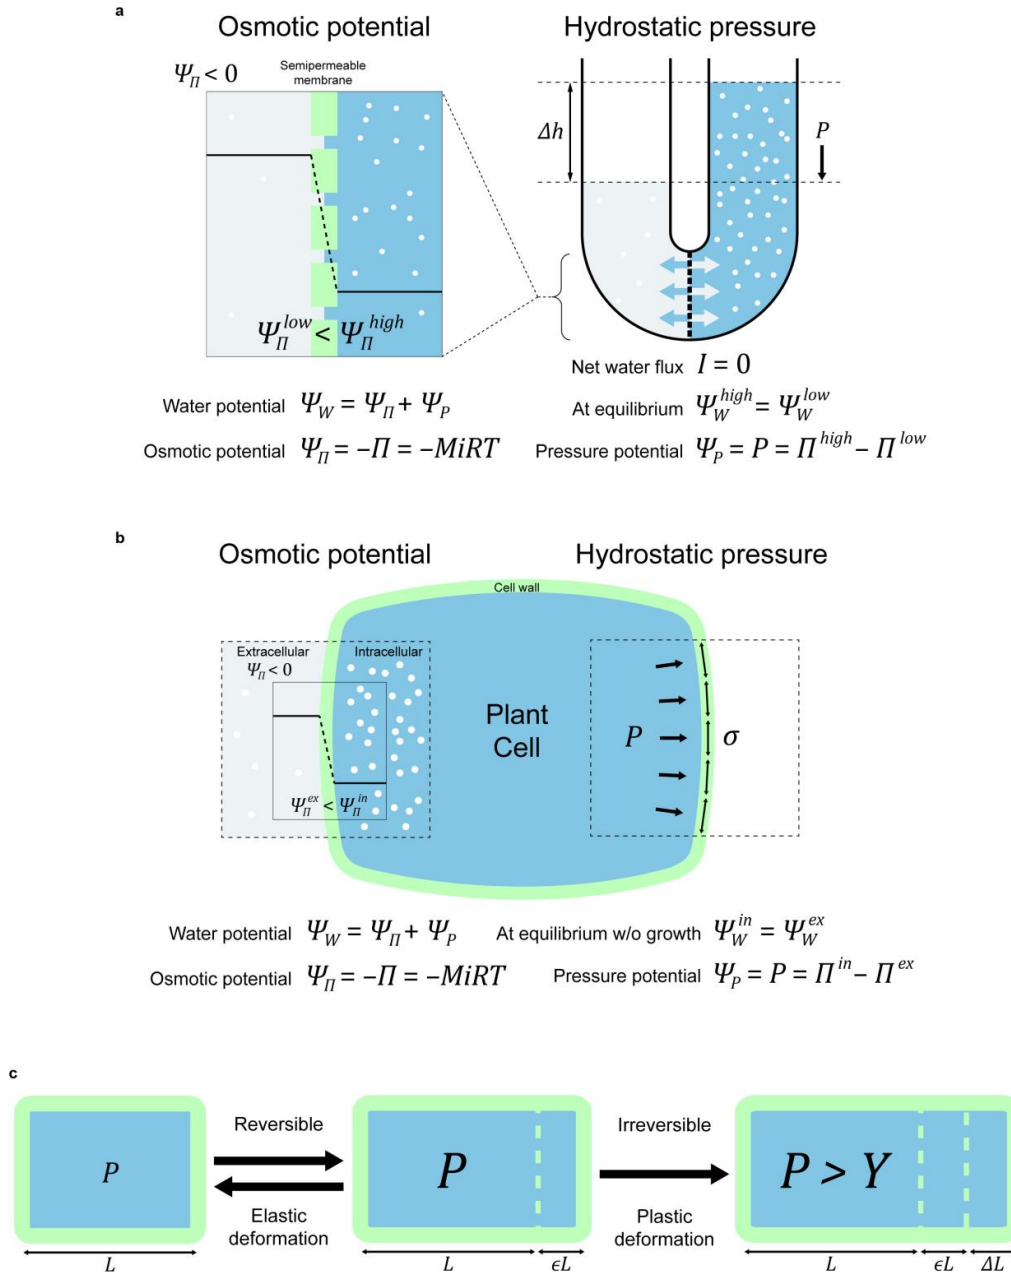

**Extended Data Figure 1. Osmotic pressure, hydrostatic pressure and the Lockhart-Ortega equation of growth.**

(a) Osmosis occurs when solutions of different osmotic pressure  $\Pi$ , due to different solute concentration (depicted by the density of white dots), are separated by a semipermeable membrane. Difference of osmotic potential  $\Psi_{\Pi}$  (depicted by horizontal black lines, always negative in solutions) across the membrane dictates that solvent flows from high to low potential compartment (low to high solute concentration). In a U-shaped tube setup (right), osmosis may stop before the two compartments reach the same concentration, as the extra volume (in fact height,  $\Delta h$ ) in the higher-concentration compartment exerts a hydrostatic pressure  $P$  due to gravity that pushes the solvent back.  $P$  increases until reaching the same value as  $\Delta \Pi$  at equilibrium where the total water potential  $\Psi_W$  is equal on both sides, and the net solvent flux  $I = 0$  (indicated by the opposite blue arrows).  $M$ , solute molar concentration;

$i$ , van t'Hoff index of solute that disassociates;  $R$ , ideal gas constant;  $T$ , absolute temperature. (b) Osmosis in a plant cell, where gravity is neglected for its small size. Because of the rigid cell wall that restricts the cell volume, hydrostatic pressure  $P$ , alias turgor pressure, builds up alongside cell wall tension  $\sigma$  to counterbalance the difference of osmotic potential  $\Psi_{II}$ , until  $P = \Delta\Pi$ . (c) A schematic representation of the Lockhart-Ortega equation, where 1D cell length  $L$  elongation is a combination of reversible stretch  $\epsilon L$  (elasticity,  $\epsilon$  is elastic strain) and cell wall yield  $\Delta L$  at longer timescale (viscosity) if  $P$  is higher than a threshold  $Y$  (plasticity,  $\Delta L = \phi t L (P - Y)$ ,  $\phi$  is wall extensibility,  $t$  is time).

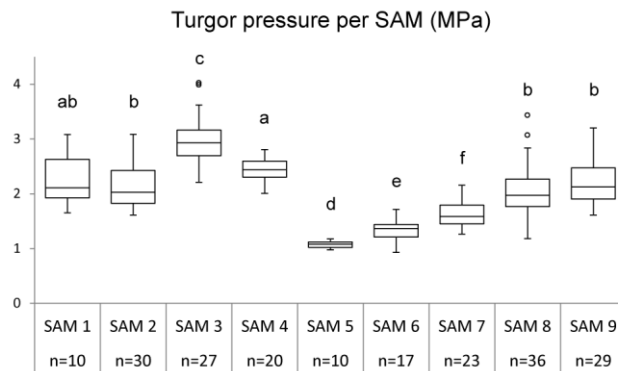

**Extended Data Figure 2. Turgor pressure is highly heterogeneous between individual SAM.**

All samples are oryzalin-treated SAM,  $n$  is cell number. Circles are Tukey's outliers; lowercase letters indicate statistically different populations (Student's  $t$ -test,  $p < 0.05$ ).

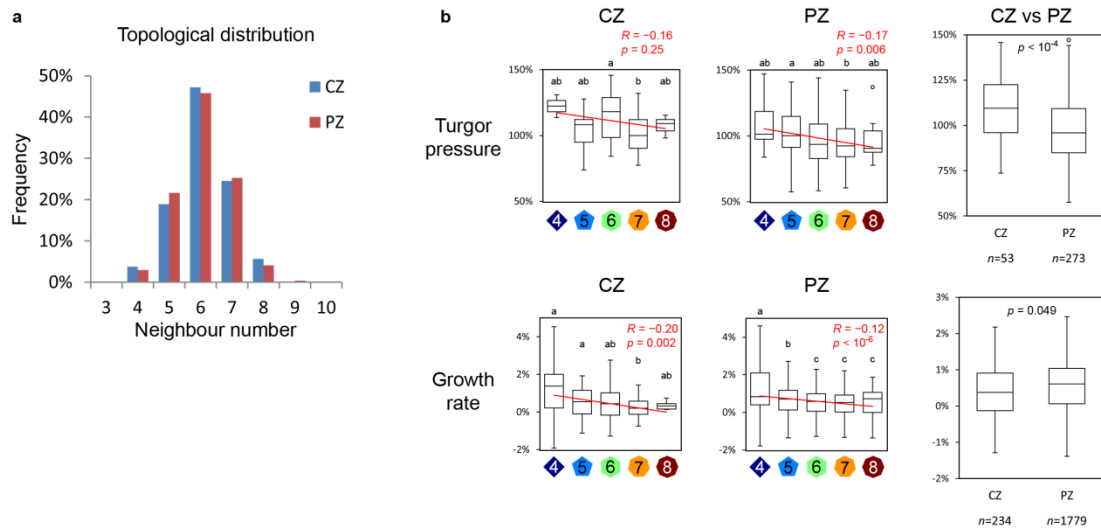

**Extended Data Figure 3. Central zone and peripheral zone of untreated meristems have similar trends of turgor pressure and growth.**

(a) Frequency of  $N$ -neighboured cells in central zone (CZ) and peripheral zone (PZ) shows no significant difference (Kolmogorov–Smirnov test, confidence level  $\alpha = 0.05$ ,  $D_{n,m} < D_\alpha$ ). (b) Both turgor pressure (upper) and growth rate per hour (lower) anticorrelate with cell neighbour number in CZ and PZ. Circles in box plots are Tukey’s outliers; lowercase letters indicate statistically different populations (Student’s  $t$ -test,  $p < 0.05$ ); red lines indicate linear regressions, with Pearson correlation coefficient  $R$  and corresponding  $p$ -value. Tukey’s outliers are not plotted for growth rate vs neighbour number plots, but are included for statistical analyses. Note that CZ has higher turgor pressure, and grows slightly slower than PZ.

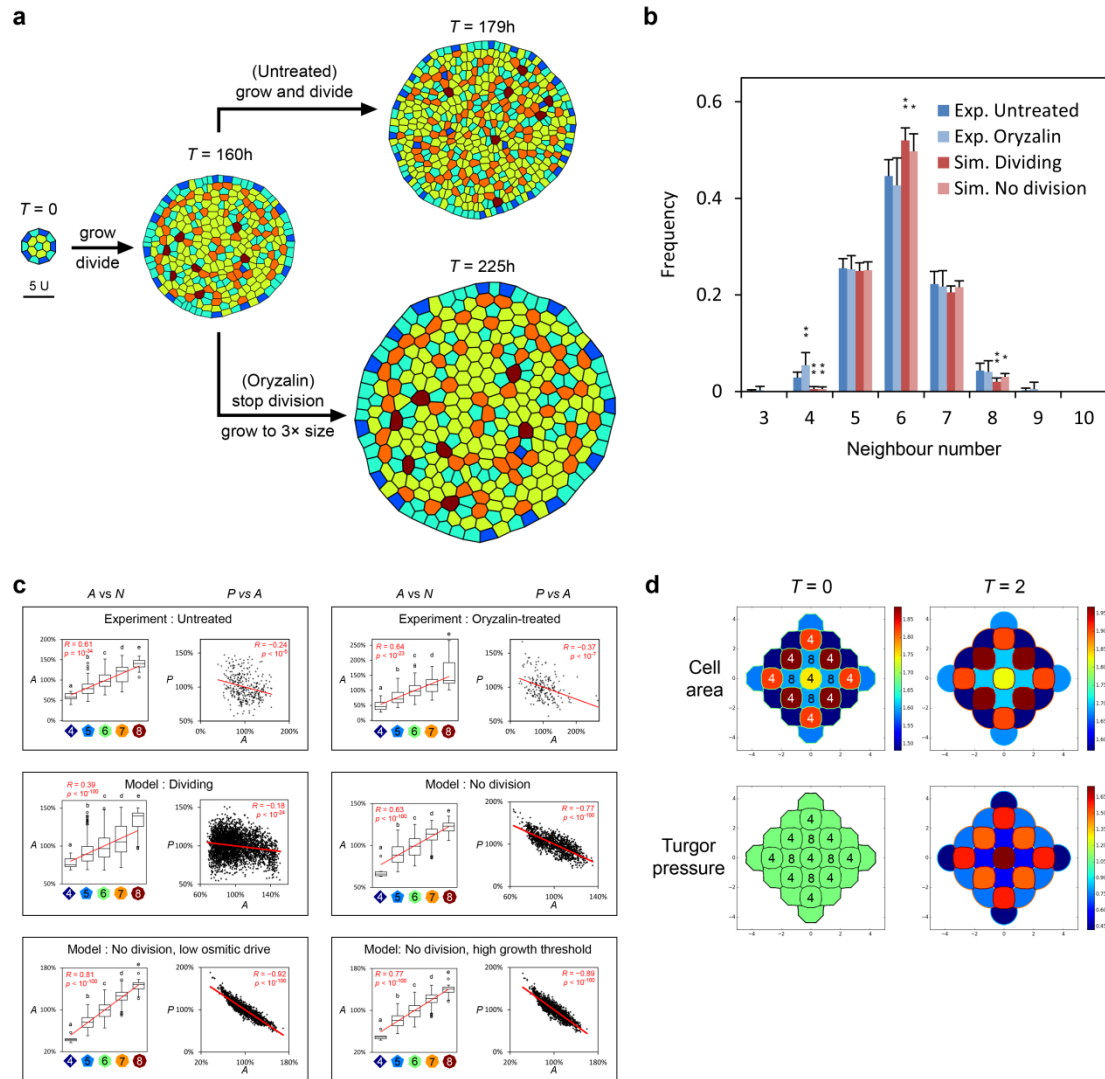

#### Extended Data Figure 4. Cell size and topology in SAM.

(a) Simulation checkpoints, where the initial mesh grows and divides until 160h, then division is stopped and parameters are changed to recapitulate oryzalin treatment, until the mesh reach a final size of 3 times of initial size. Scale is 5 unit length, colours indicate neighbour number.

(b) Observed (Exp.) and simulated (Sim.) SAMs have similar topological distribution between different conditions, error bars are standard deviations.

(c) Box plots of normalized cell area  $A$  against cell neighbour number  $N$ , and dot plots of normalized turgor pressure  $P$  against  $A$  in different experimental and simulation conditions, same data from Figure 1 to 4. Circles are Tukey's outliers; lowercase letters indicate statistically different populations (Student's  $t$ -test,  $p < 0.05$ ); red lines indicate linear regressions, with Pearson correlation coefficient  $R$  and corresponding  $p$ -value.

(d) Simulation with uncoupled cell size and topology (4-neighbored cells have bigger area than 8-neighbored cells) shows that turgor pressure builds up higher in fewer-neighbored cells, not smaller cells. This consolidates the topology-pressure correlation.

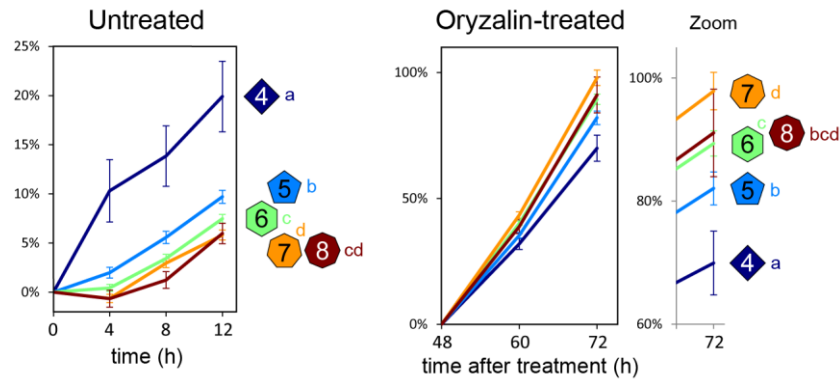

**Extended Data Figure 5. Relative cell size increments confirm growth trend inversion between conditions.**

Cell-specific relative areal increment  $dA / A = A_t / A_0 - 1$  per topological category, computed from experimental observations. Line colours are topological categories indicated by the polygons, which are ranked high-to-low (top-to-bottom) next to the plots. Error bars are standard errors of means; lowercase letters indicate statistically different populations (Student's *t*-test,  $p < 0.05$ ). The ranks show that fewer-neighboured cells grow more in untreated SAM (11 SAMs,  $n = 2013$  cells) but grow less in oryzalin-treated SAM (14 SAMs,  $n = 1160$  cells).



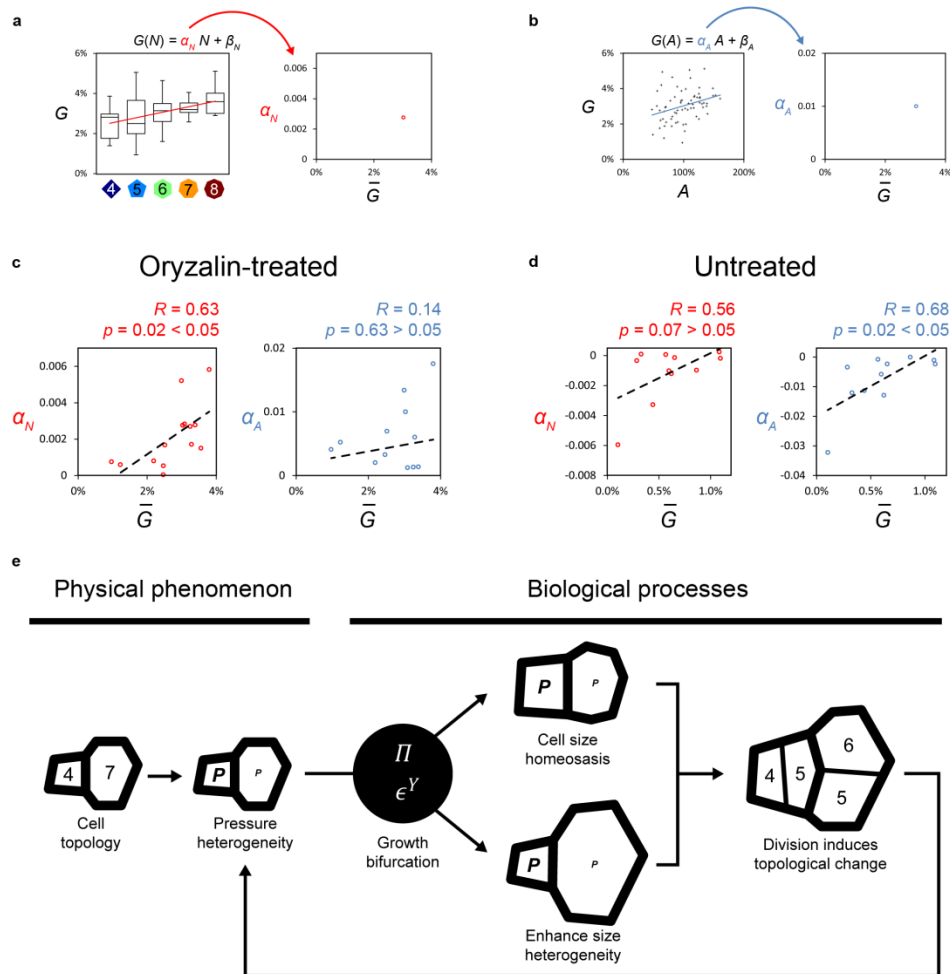

**Extended Data Figure 6. Growth heterogeneity correlates with topology in oryzalin-treated SAM, but correlates with cell size in untreated SAM.**

(a and b) Examples of cellular growth rate heterogeneity, depicted by the linear regression slope of growth rate  $G$  against topology  $N$  ( $\alpha_N$ , red) or  $G$  against normalized cell area  $A$  ( $\alpha_A$ , blue), plotted against average growth rate  $\bar{G}$  of one individual oryzalin-treated SAM.  $\beta$  is regression intercept, which is not used here. (c) Among oryzalin-treated SAMs ( $n = 14$ ), faster growing SAMs have bigger cellular growth heterogeneity against topology (bigger  $\alpha_N$ ), while growth heterogeneity against cell size  $\alpha_A$  shows no significant correlation. (d) Untreated SAMs ( $n = 11$ ) show significantly weaker growth heterogeneity against cell size in faster growing SAMs (note that most  $\alpha_A$  are negative, depicting anticorrelation, so bigger  $\alpha_A$  means slope closer to 0, thus smaller heterogeneity), while growth heterogeneity against topology  $\alpha_N$  is less associated with SAM growth rate. Dotted black lines are linear regressions of  $\alpha$  against  $\bar{G}$ , with Pearson correlation coefficient  $R$  and the corresponding  $p$ -value. (e) Schematic summary of heterogeneity in turgor pressure and growth rate. Heterogeneous turgor pressure emerges from tissue topology as a pure physical phenomenon, while growth rate bifurcates according to the controlling regimes that can be shifted biologically. Cell division causes topological changes that re-establish turgor pressure heterogeneity.  $P$ , turgor pressure;  $\Pi$ , osmotic pressure;  $\epsilon^Y$ , strain threshold.

## 182 **Methods**

### 183 **Plant materials, treatments and growth conditions**

184 *Arabidopsis thaliana GFP-LTi6b* (ecotype WS-4) reporter line was used<sup>31</sup>. Untreated  
185 inflorescence meristems were obtained from soil-grown plants, first in short-day (8 h light  
186 20 °C / 16 h dark 19 °C cycle) for 3 to 4 weeks then transferred to long-day (16 h light 20 °C / 8  
187 h dark 19 °C cycle) for 1 to 2 weeks to synchronize bolting. Oryzalin-treated inflorescence  
188 meristems were obtained from plants grown on custom-made *Arabidopsis* medium<sup>32</sup> (Duchefa)  
189 supplemented with 1% agar-agar (Merck) and 10 µM N-1-naphthylphthalamic acid (NPA,  
190 Sigma-Aldrich/Merck) for 3 weeks. Pin-formed inflorescence meristems from NPA medium  
191 were immersed in 10 µg/mL oryzalin (Sigma-Aldrich/Merck) twice (3 h duration, 24 h  
192 interval)<sup>19</sup>. For mechanical measurements and time-lapse confocal imaging, meristems were  
193 mounted on *Arabidopsis* apex culture medium (ACM)<sup>32</sup> with 2% agarose and 0.1% plant  
194 preservation mixture (PPM, Plant Cell Technology) to prevent contamination, and cultivated  
195 in long-day condition.

### 196 **Atomic force microscopy**

197 Untreated meristems (dissected, with most late stage-2 floral primordia removed to prevent  
198 blocking of the cantilever) and oryzalin-treated meristems were mounted on ACM (2%  
199 agarose, 0.1% PPM) the night before. Drops of 2% low melting agarose (Duchefa) were  
200 applied around the lower parts of meristems for mechanical stabilization. For oryzalin-treated  
201 meristems, 72 h post-treatment meristems were measured.

202 AFM indentations were performed as in Beuzamy et al., 2015<sup>18</sup>. Specifically, a BioScope  
203 Catalyst model AFM (Bruker) under a MacroFluo optical epifluorescence microscope (Leica)  
204 was used. All measurements were done with customized 0.8 µm diameter spherical probes  
205 mounted on silicon cantilevers of 42 N/m spring constant (SD-Sphere-NCH-S-10,  
206 Nanosensors). Cantilever deflection sensitivity was calibrated against a clean sapphire wafer  
207 submerged in water before each session.

208 Meristems were submerged in water during AFM measurements. PeakForce QNM mode was  
209 used to record sample surface topography and cell contours (aided by the stiffness difference  
210 between periclinal and anticlinal cell walls on DMT modulus maps) in overlapping square  
211 tiles of  $30 \times 30$  to  $50 \times 50 \mu\text{m}^2$  ( $128 \times 128$  pixels). Force curves were obtained by the  
212 point-and-shoot mode of the Bruker software, with at least 3 locations chosen near the  
213 barycentre of each cell, and 3 consecutive indentations per location, making at least 9 force  
214 curves per cell. Approximately 10  $\mu\text{N}$  maximum force was applied during each indentation,  
215 corresponding to approximately 1  $\mu\text{m}$  indentation depth.

### 216 **Force curve analysis**

217 Turgor pressure was determined as previously reported<sup>18</sup>. Specifically, cell wall elastic  
218 modulus (Hertzian model, 1~10% maximal indentation force) and cell apparent stiffness  
219 (linear, 75~99% maximal indentation force) were retrieved from each force curve by the  
220 NanoScope Analysis software (Bruker). Quality of force curves were checked empirically and  
221 by the fit coefficient of determination  $r^2 > 0.99$ . Cells with only low quality force curves were  
222 not analysed. Cell surface curvatures (mean and Gaussian) were estimated from AFM  
223 topographic images, with the curvature radii fitted to the long and short axes of each cell.  
224 Turgor pressure was further deduced from each force curve (100 iterations) with the  
225 simplified hypothesis that the surface periclinal cell walls has constant thickness (200 nm),  
226 and cell-specific turgor pressure is retrieved by averaging all turgor deductions per cell.

227 For cell registration, confocal stacks of each meristem were obtained prior to AFM  
228 measurements by an LSM 700 confocal (Carl Zeiss). Surface projection of *GFP-LTi6b* signal  
229 was generated by the software MerryProj<sup>33</sup>, then rescaled and rotated (affine transformation)  
230 to overlay the AFM image tiles. The resulting surface projection image was used to generate  
231 cell contour image of the whole meristemic surface using morphological segmentation  
232 plugin<sup>34</sup> for the software ImageJ (<https://fiji.sc/>), while the relative positions of each AFM  
233 indentation location is then registered onto the cell contour image, along with cellular  
234 geometrical and topological analyses, using the NanoIndentation plugin for ImageJ<sup>35</sup>.

235 Since each meristem had different turgor pressure range<sup>20</sup>, cellular turgor pressure was

236 normalized to the average of each meristem for comparing cell-to-cell turgor pressure  
237 heterogeneity without meristem-specific effects.

### 238 **Time-lapse confocal microscopy**

239 Untreated (dissected) and oryzalin-treated meristems were mounted and grown on ACM with  
240 0.8% agarose and 0.1% PPM for live imaging. Confocal stacks were taken on an LSM 700  
241 confocal with a W N-Achroplan 40x/0.75 M27 water immersion objective (Carl Zeiss) and a  
242 TCS SP8 confocal (Leica) with a Fluotar VISIR 25x/0.95 water immersion lens. GFP was  
243 excited at 488 nm and emission detected between 415 – 735 nm. Stacks have resolution of  
244 1028×1028 pixels, with resolution ranging between 3.2 to 4.4 pixels/μm; Z steps were  
245 between 0.5 and 0.85μm.

### 246 **Image processing and geometric analysis**

247 3D shell mesh and surface projection of untreated meristems were generated from confocal  
248 stacks using the level set method (LSM) addon<sup>36</sup> for the software MorphoGraphX (MGX)<sup>37</sup>.  
249 For oryzalin-treated meristems, 2D surface projections were generated by MerryProj<sup>33</sup> and  
250 imported into MGX for further processing. Projected images were segmented using watershed  
251 method after manual seeding, and cell lineage between time points was manually assigned in  
252 the meristem proper. A custom-made Python script was used to trace cell lineage between  
253 multiple time points and determine cell topology based on the anticlinal wall number exported  
254 from MGX. Areal relative exponential growth rate per hour was calculated as:

$$G = \frac{\ln(A_t/A_0)}{\Delta t}$$

255 where  $\Delta t$  is time interval in hours,  $A_0$  is original cellular area at time  $t_0$ , and  $A_t$  is final area at  
256 time  $t_0 + \Delta t$ . Cells undergone topological changes (i.e. divided cells and cells adjacent to new  
257 division planes) during the acquisition were not included in the growth analyses.

258 For figure panels, brightness and contrast of confocal images were linearly enhanced for  
259 better visual. To synchronize panel shape and size, black background with no relevant  
260 information was cropped from or added to the edge of the panels.

## 261 **Statistical analysis**

262 All Tukey box plots depict the first, second (median) and third quartiles of data distribution,  
263 with whiskers marking the lowest/highest data within 1.5 interquartile ranges (IQR) of the  
264 lower/upper quartiles. Tukey's outliers are depicted as small circles outside the whiskers.  
265 Absolute values like turgor pressure and cell area were normalized to the average per  
266 meristem, while relative values like growth rate do not require normalization. After  
267 normalization, every cell was consider as one biological sample, and all linear regressions and  
268 Pearson correlations were performed on whole datasets. For simulations, cells on the edge of  
269 the mesh were not analysed due to border effect. Extremely rare polygon classes (i.e. triangle  
270 and nonagon) were not shown on the box plots but were included in linear regression and  
271 Pearson correlation tests.

## 272 **Modelling**

273 *Summary.* We build a vertex-based model of plant tissues at cellular level that couples  
274 osmosis-driven hydraulic fluxes between cells and from apoplast with a fixed water potential,  
275 and cell wall mechanics which resists and grows under tension. Turgor and growth rate  
276 heterogeneities emerge from this coupling and from the heterogeneities in cells sizes and  
277 topology (number of neighbours).

278 We consider a collection of  $N$  polygonal cells  $i = 1, \dots, N$  that form a mesh; this mesh  
279 evolves with the appearance of new cells because of cell division. The walls between cells are  
280 discretized into one or several segments. Given the topology, the mesh is fully characterized  
281 by the position of the vertices. The walls are given a height  $h$  and a width  $w$ .

282 *Cell wall rheology.* The cell walls are modelled as a visco-elasto-plastic material, which  
283 would be equivalent to the Ortega model<sup>17</sup> in the case of an elongating cell. Let  $\sigma_k$  be the  
284 stress of a wall segment  $k$ ; the constitutive law writes  $\sigma_k = E_k \varepsilon_k^e$  where  $E_k$  is the elastic  
285 modulus and  $\varepsilon_k^e$  is the elastic deformation of the wall. Let  $l_k$  be the length of segment  $k$ , the  
286 rate of change of  $\varepsilon_k^e$  is given by:

$$\frac{d\varepsilon_k^e}{dt} + \frac{2w}{h} \phi_k^w E_k \max(0, \varepsilon_k^e - \varepsilon_k^Y) = \frac{1}{l_k} \frac{dl_k}{dt}$$

287 where  $\phi_k^w$  is the extensibility and  $\varepsilon_k^Y$  is the yield deformation of segment  $k$ . Equivalently,  
 288 we could define a yield stress.

289 *Mechanical equilibrium.* Let  $P_i$  be the turgor pressure in each cell  $i$ . The tissue being at every  
 290 moment in a quasi-static equilibrium, pressure forces on wall edges and elastic forces within  
 291 walls balance exactly at each vertex  $v$ :

$$\frac{1}{2} \sum_{k \in f(v)} \Delta_k P A_k \mathbf{n}_k + \sum_{k \in f(v)} E_k \varepsilon_k^e a_k \mathbf{e}_{k,v} = 0$$

292 Where  $f(v)$  is the set of walls adjacent to junction  $v$ , and  $\Delta_k P = P_{k_1} - P_{k_2}$  is the pressure  
 293 jump across wall face  $k$ , with  $k_1 < k_2$  as indices of the cells separated by face  $k$ ,  $A_k = hl_k$  is  
 294 the area of the face  $k$  on which pressure is exerted,  $\mathbf{n}_k$  is the normal vector to face  $k$ , oriented  
 295 from cell  $k_1$  to cell  $k_2$ , and  $a_k = hw$  is the cross-section of the face, on which the elastic  
 296 stress is exerted; finally,  $\mathbf{e}_{k,v}$  is the unit vector in the direction of face  $k$ , oriented from junction  
 297  $v$  to the other end of face  $k$ . In the case of a single cylindrical cell for which growth is  
 298 restricted to its principal direction, the model is equivalent to the Lockhart-Ortega model.

299 *Fluxes.* For each cell  $i$ , the apoplastic pathway is represented as a flux  $U_i^a$  (in volume per  
 300 time unit) from the apoplast of constant water potential  $\Psi^a$  through a perfectly  
 301 semi-permeable membrane:  $U_i^a = A_i L_i^a (P^M - P_i)$ , where  $A_i$  is the area of each cell in contact  
 302 with the apoplast,  $L_i^a$  is the corresponding water conductivity,  $P^M = \pi_i + \Psi^a$  is assumed  
 303 constant, and  $\pi_i$  is the osmotic pressure of cell  $i$ .

304 The symplasmic pathway corresponds to flows that occur through plasmodesmata, channels  
 305 between cells that convey both water and solutes. The symplasmic flows thus only depend on  
 306 turgor pressure difference. Let  $L_{ij}$  be the symplasmic water conductivity corresponding to the  
 307 interface between two neighbour cells  $i$  and  $j$ , and  $A_{ij}$  their contact area, both assumed  
 308 symmetric:  $L_{ij} = L_{ji}$  and  $A_{ij} = A_{ji}$ . The symplasmic flux  $U_{ji}^s$  (in volume per time unit)  
 309 from cell  $j$  to  $i$  is defined by:

$$U_{ji}^s = A_{ij}L_{ij}^s(P_j - P_i)$$

310 Finally, the total water flux for cell  $i$  is the sum of the apoplasmic flux  $U_i^a$  and the  
311 symplasmic fluxes  $U_{ji}^s$  with all its neighbors, so that its volume variation can be expressed as:

$$\frac{dV_i}{dt} = A_i L_i^a (P^M - P_i) + \sum_{j \in n(i)} A_{ij} L_{ij}^s (P_j - P_i)$$

312 where  $n(i)$  is the set of neighbours of cell  $i$ .

313 *Cell division.* Cells divide when they reach a target volume  $V_0$ ; this value is fixed and equal  
314 for all the cells. The axis of division is chosen as follows: it passes through the centre of mass  
315 of the cell and minimizes the sum of the perimeters of the two daughter cells. Because cell  
316 plate is synthesized from the centre of the dividing cell and connects to old walls at the end of  
317 cytokinesis, the young wall is initially not stretched and the corresponding new edge is given  
318 an elastic deformation  $\varepsilon_k^e = 0$ . In order to introduce some variability in the simulations, we  
319 added some noise on two division parameters: the axis of division is translated along its  
320 normal unit vector by a random distance following the uniform distribution  $\text{unif}(-0.05, 0.05)$ ;  
321 and the target volume for division is multiplied for each cell by a random number following  
322 the uniform distribution  $\text{unif}(1 - 0.025, 1 + 0.025)$ .

323 *Numerical resolution.* In the Lockhart-Ortega model, the compatibility between wall  
324 elongation and cell volume increase is automatically enforced through the geometrical  
325 constraint of unidirectional growth that leads to equal relative growth rate of the cell and  
326 strain rate of the walls. In our multicellular model, this equality is no longer true. Instead, the  
327 lengths  $l(X)$  of the edges and the volumes  $V(X)$  of the cells are expressed as functions of the  
328 positions  $X$  of the vertices; then, given an initial position  $X$  of the vertices and elastic  
329 deformation  $\varepsilon^e$  of the edges, the equations of wall rheology, mechanical equilibrium, and  
330 water fluxes form a closed set of equations with respect to the unknowns  $X$ ,  $P$ , and  $\varepsilon^e$  that  
331 allow to predict their evolution.

332 To give an idea of the mathematical complexity of the problem, one may consider the

333 following example: in a connected tissue, if one cell is stretched and forced to increase its  
334 volume, an equal volume of water has to enter the cell, either from the apoplastic  
335 compartment or the neighbour cells. In the latter case, pressure should drop in the neighbour  
336 cells, which should attract water from their own neighbours, and this could propagate to  
337 further cells depending on the geometry of the tissue and the parameters. Volume and  
338 therefore positions of the vertices could be also affected. Finally, one can see that the  
339 interaction between hydraulics and mechanics implies long range interactions where pressure  
340 plays a key role. We developed an original algorithm and implemented it in an in-house code,  
341 where at each time step, the mechanical equilibrium is resolved under constraints on the cell  
342 volume (from the water fluxes), and constraints on the cells edges (from the rheological law  
343 of the walls).

344 The computations were run on a computer with a 3.6GHz Intel Xeon E5 processor, 64 GB of  
345 RAM, and running Linux Debian Stretch. The typical computing time was one week for each  
346 computation.

347 *Procedure for the computations.* We first run in parallel 8 computations with cell division  
348 with parameters (see below) chosen so that the model mimics the behaviour of the untreated  
349 meristems regarding turgor and growth rate; these computations were run until  $t = 179.1\text{h}$ .  
350 To mimic the oryzalin treatment, the current states of the “untreated” computations at  
351  $t = 160\text{h}$  (around 300 cells) are used as initial conditions for the oryzalin case: division is  
352 stopped, and we run 5 computations either with the same parameters, or with some  
353 parameters modified so that the behaviour of the oryzalin treated meristems is recovered (see  
354 below); the computations are run until the total volume has been multiplied by three from this  
355 initial state.

356 *Parameterization of the model.* A first requirement is to ensure that mean turgor (resp. mean  
357 relative growth rate) is of the order of few MPa (resp. a few % per hour) as in experiments.  
358 The Lockhart-Ortega model – which is at the basis of the multicellular mode we use –  
359 provides a simple way to predict these two quantities (see Cheddadi et al., unpublished): first  
360 the yield turgor  $P^Y$  (above which growth occurs, which can be evaluated from  $E, \epsilon^Y, h, w$ )



361 sets a lower bound for turgor, and  $P^M = \Psi + \pi$  sets an upper bound, where  $\Psi = -2$  MPa  
 362 is the water potential of the apoplastic compartment; then one can estimate the relative growth  
 363 rate as a function of  $L^a, \phi^w, P^M, P^Y$ . The Lockhart-Ortega model shows that  $L^a$  and  $\phi^w$  play  
 364 a symmetric role in the limitation of growth (as two electrical resistances in series), but in the  
 365 present multicellular setup, the exploration of the parameters space showed that only a  
 366 flux-limitation (relatively low value of  $L^a$ ) allows to capture both the untreated and oryzalin  
 367 cases. Similarly, we chose a relatively low value of the cell-cell conductivity  $L^S$  so that the  
 368 turgor heterogeneities do not vanish. Then, as explained in the main text, we chose the  
 369 parameters of the untreated case so that the mechanical negative contribution to growth (cells  
 370 with less neighbours are disfavoured) is minimized: this could be obtained by setting the  
 371 osmotic pressure value far from the yield turgor  $P^Y$ . Conversely, the shift to the oryzalin  
 372 regime was obtained by either increasing  $\epsilon^Y$  and therefore  $P^Y$  by a factor 2, or by  
 373 decreasing the osmotic pressure from 17 MPa to 9 MPa. The values of the parameters used in  
 374 the untreated case are recapitulated in the table below.

| Parameter                      | Value                                   | Parameter          | Value                                                    |
|--------------------------------|-----------------------------------------|--------------------|----------------------------------------------------------|
| Unit length                    | 10 $\mu\text{m}$                        | Apoplasmic         |                                                          |
| Cell height $h$                | 10 $\mu\text{m}$                        | conductivity $L^a$ | $1.7 \times 10^{-12} \text{ m MPa}^{-1} \text{ s}^{-1}$  |
| Cell wall thickness<br>$w$     | 0.5 $\mu\text{m}$                       | Symplasmic         |                                                          |
| Elastic modulus $E$            | 2252 MPa                                | conductivity $L^S$ | $1.97 \times 10^{-13} \text{ m MPa}^{-1} \text{ s}^{-1}$ |
| Wall extensibility<br>$\phi^w$ | $5.6 \times 10^{-6} \text{ MPa s}^{-1}$ | Osmotic pressure   | 17 MPa                                                   |
| Strain threshold $\epsilon^Y$  | 0.05                                    | $\pi$              |                                                          |

375 **Supplementary table 1.** Parameters used for the untreated model.

### 376 Data availability

377 All materials, scripts and datasets generated and analysed during the current study are  
 378 available from the corresponding authors upon reasonable request.

379 **References**

- 380 1. Hong, L. *et al.* Heterogeneity and Robustness in Plant Morphogenesis: From Cells to  
381 Organs. *Annu. Rev. Plant Biol.* **69**, 469–495 (2018).
- 382 2. Kamimoto, K. *et al.* Heterogeneity and stochastic growth regulation of biliary epithelial  
383 cells dictate dynamic epithelial tissue remodeling. *eLife* **5**, (2016).
- 384 3. Ietswaart, R., Rosa, S., Wu, Z., Dean, C. & Howard, M. Cell-Size-Dependent Transcription  
385 of FLC and Its Antisense Long Non-coding RNA COOLAIR Explain Cell-to-Cell Expression  
386 Variation. *Cell Syst.* **4**, 622-635.e9 (2017).
- 387 4. Long, Y. *et al.* In vivo FRET-FLIM reveals cell-type-specific protein interactions in  
388 Arabidopsis roots. *Nature* **548**, 97–102 (2017).
- 389 5. Chubb, J. R. Symmetry breaking in development and stochastic gene expression. *Wiley*  
390 *Interdiscip. Rev. Dev. Biol.* **6**, e284 (2017).
- 391 6. Donati, G. & Watt, F. M. Stem Cell Heterogeneity and Plasticity in Epithelia. *Cell Stem Cell*  
392 **16**, 465–476 (2015).
- 393 7. Gerdes, M. J. *et al.* Emerging Understanding of Multiscale Tumor Heterogeneity. *Front.*  
394 *Oncol.* **4**, (2014).
- 395 8. Eldar, A. & Elowitz, M. B. Functional roles for noise in genetic circuits. *Nature* **467**, 167–  
396 173 (2010).
- 397 9. Watanabe, K., Umeda, T., Niwa, K., Naguro, I. & Ichijo, H. A PP6-ASK3 Module  
398 Coordinates the Bidirectional Cell Volume Regulation under Osmotic Stress. *Cell Rep.* **22**,  
399 2809–2817 (2018).
- 400 10. Xie, K., Yang, Y. & Jiang, H. Controlling Cellular Volume via Mechanical and Physical

- 401 Properties of Substrate. *Biophys. J.* **114**, 675–687 (2018).
- 402 11. Guo, M. *et al.* Cell volume change through water efflux impacts cell stiffness and stem  
403 cell fate. *Proc. Natl. Acad. Sci.* **114**, E8618–E8627 (2017).
- 404 12. Dumais, J. & Forterre, Y. “Vegetable Dynamicks”: The Role of Water in Plant Movements.  
405 *Annu. Rev. Fluid Mech.* **44**, 453–478 (2012).
- 406 13. Stewart, M. P. *et al.* Hydrostatic pressure and the actomyosin cortex drive mitotic cell  
407 rounding. *Nature* **469**, 226–230 (2011).
- 408 14. Montel, F. *et al.* Stress clamp experiments on multicellular tumor spheroids. *Phys. Rev.*  
409 *Lett.* **107**, 188102 (2011).
- 410 15. Rojas, E. R. & Huang, K. C. Regulation of microbial growth by turgor pressure. *Curr. Opin.*  
411 *Microbiol.* **42**, 62–70 (2017).
- 412 16. Kroeger, J. H., Zerkour, R. & Geitmann, A. Regulator or driving force? The role of turgor  
413 pressure in oscillatory plant cell growth. *PLoS One* **6**, e18549 (2011).
- 414 17. Ortega, J. K. Augmented growth equation for cell wall expansion. *Plant Physiol.* **79**, 318–  
415 320 (1985).
- 416 18. Beuzamy, L., Derr, J. & Boudaoud, A. Quantifying Hydrostatic Pressure in Plant Cells by  
417 Using Indentation with an Atomic Force Microscope. *Biophys. J.* **108**, 2448–2456 (2015).
- 418 19. Corson, F. *et al.* Turning a plant tissue into a living cell froth through isotropic growth.  
419 *Proc. Natl. Acad. Sci. U. S. A.* **106**, 8453–8458 (2009).
- 420 20. Beuzamy, L., Louveaux, M., Hamant, O. & Boudaoud, A. Mechanically, the Shoot Apical  
421 Meristem of Arabidopsis Behaves like a Shell Inflated by a Pressure of About 1 MPa.  
422 *Front. Plant Sci.* **6**, (2015).

- 423 21. Ishihara, S. *et al.* Comparative study of non-invasive force and stress inference methods  
424 in tissue. *Eur. Phys. J. E Soft Matter* **36**, 9859 (2013).
- 425 22. Lucas, W. J., Ham, B.-K. & Kim, J.-Y. Plasmodesmata - bridging the gap between  
426 neighboring plant cells. *Trends Cell Biol.* **19**, 495–503 (2009).
- 427 23. Kumar, N. M. & Gilula, N. B. The Gap Junction Communication Channel. *Cell* **84**, 381–388  
428 (1996).
- 429 24. McLean, P. F. & Cooley, L. Protein Equilibration through Somatic Ring Canals in  
430 *Drosophila*. *Science* **340**, (2013).
- 431 25. Weaire, D. L. & Hutzler, S. *The Physics of Foams*. (Clarendon Press, 2001).
- 432 26. Gibson, W. T. & Gibson, M. C. Chapter 4 Cell Topology, Geometry, and Morphogenesis in  
433 Proliferating Epithelia. in *Current Topics in Developmental Biology* **89**, 87–114 (Academic  
434 Press, 2009).
- 435 27. Péret, B. *et al.* Auxin regulates aquaporin function to facilitate lateral root emergence.  
436 *Nat. Cell Biol.* **14**, 991–998 (2012).
- 437 28. Serrano-Mislata, A., Schiessl, K. & Sablowski, R. Active Control of Cell Size Generates  
438 Spatial Detail during Plant Organogenesis. *Curr. Biol.* **25**, 2991–2996 (2015).
- 439 29. Willis, L. *et al.* Cell size and growth regulation in the *Arabidopsis thaliana* apical stem cell  
440 niche. *Proc. Natl. Acad. Sci. U. S. A.* **113**, E8238–E8246 (2016).
- 441 30. Tsugawa, S. *et al.* Clones of cells switch from reduction to enhancement of size variability  
442 in *Arabidopsis* sepals. *Development* **144**, 4398–4405 (2017).
- 443

444 **Methods References**

- 445 31. Cutler, S. R., Ehrhardt, D. W., Griffiths, J. S. & Somerville, C. R. Random GFP::cDNA  
446 fusions enable visualization of subcellular structures in cells of Arabidopsis at a high  
447 frequency. *Proc. Natl. Acad. Sci.* **97**, 3718–3723 (2000).
- 448 32. Stanislas, T., Hamant, O. & Traas, J. Chapter 11 - In-vivo analysis of morphogenesis in  
449 plants. in *Methods in Cell Biology* (ed. Lecuit, T.) **139**, 203–223 (Academic Press, 2017).
- 450 33. Reuille, P. B. de, Bohn-Courseau, I., Godin, C. & Traas, J. A protocol to analyse cellular  
451 dynamics during plant development. *Plant J.* **44**, 1045–1053 (2005).
- 452 34. Legland, D., Arganda-Carreras, I. & Andrey, P. MorphoLibJ: integrated library and plugins  
453 for mathematical morphology with ImageJ. *Bioinformatics* **32**, 3532–3534 (2016).
- 454 35. Mirabet, V. *et al.* NanoIndentation, an ImageJ Plugin for the Quantification of Cell  
455 Mechanics. *Methods Mol. Biol.* (in press).
- 456 36. Kiss, A. *et al.* Segmentation of 3D images of plant tissues at multiple scales using the  
457 level set method. *Plant Methods* **13**, 114 (2017).
- 458 37. Reuille, P. B. de *et al.* MorphoGraphX: A platform for quantifying morphogenesis in 4D.  
459 *eLife* **4**, e05864 (2015).

460
